# Supplementary material for: Comparative analysis of antimicrobial resistance and genetic diversity of Bordetella bronchiseptica isolates obtained from swine within the United States
Source: Front Microbiol. 2024 Nov 28;15:1501373. doi: 10.3389/fmicb.2024.1501373 (PMC11634850; doi:10.3389/fmicb.2024.1501373)
Supplement: Supplementary file 4 [file Table_4.XLSX]

## Sheet: fimNX_genes
Isolate	Year of Isolation	State/Origin	ST	Assembly sequence status	# of fimbrial genes in fimNX locus	TRAP	fimbrial protein 3	fimbrial protein 1	fimN	fimbrial protein 4	fim2-like	fimX	paaK
KM22	1993	Hungary	7	closed	4	CJ015_07660	--	CJ015_07655	CJ015_07650		CJ015_07645	CJ015_07640	DJ015_07635
D16-020124	2016	IL	7	draft	4	09850	--	09855	09860		09865	09870	09875
D16-023682	2016	OH	7	draft	4	09965	--	09960	09955		09950	09945	09940
D16-024762	2016	SD	7	draft	5	12200	12195	12190	12185		12180	12175	12170
D16-024771	2016	OK	7	draft	4	11840	--	11845	11850		11855	11860	11865
D16-030114	2016	IN	7	draft	5	17930	17925	21215	21210		21205	21200	21195
D16-030796	2016	NE	7	draft	3	17545	--	17550	--		20865	20860	20855
D16-039084	2016	MN	7	draft	5	16800	16805	16810	16815		16820	16825	16830
D16-033247	2016	MI	7	draft	4	11100	--	11095	11090		11085	11080	11075
D16-039453	2016	OK	7	draft	5	12660	12665	12670	12675		12680	12685	12690
D16-041144	2016	MI	7	draft	4	09675	--	09680	09685		09690	09695	09700
D16-042377	2016	KS	7	draft	5	07510	07505	07500	07495		07490	07485	07480
D16-045024	2016	KS	7	draft	5	09300	09295	09290	09285		09280	09275	09270
D16-045784	2016	AR	7	draft	5	13805	13800	13795	13790		13785	13780	13775
D16-046502	2016	WI	7	draft	5	15550	15555	15560	19310		19315	19320	19325
D16-048087	2016	MO	6	draft	3	12270	--	--	12775		12780	12785	12790
D16-048258	2016	KS	7	draft	5	16785	16780	19920	19915		19910	19905	19900
D16-049392	2016	KS	7	closed	5	07700	07695	07690	07685		07680	07675	07670
D16-050946	2016	MN	7	draft	2	15245				15250		15255	15260
D16-051377	2016	TX	7	draft	5	16000	16005	16010	16015		16020	16025	16030
D17-001406	2017	OH	6	draft	3	15005	--	--	15010		15015	15020	15025
D17-003208	2017	AR	7	draft	5	16450	16445	16440	16435		16430	16425	16420
D17-003391	2017	MI	7	draft	5	09075	09080	09085	09090		09095	09100	09105
D17-004227	2017	AR	7	draft	5	05885	05890	05895	05900		05905	05910	05915
D17-004247	2017	IA	7	draft	5	11530	11525	11520	11515		11510	11505	11500
D17-005511	2017	MN	7	draft	5	11490	11495	11500	11505		11510	11515	11520
D17-007153	2017	NE	7	draft	5	14985	14980	14975	14970		14965	14960	14955
D17-008934	2017	IA	7	draft	4	13010	--	13005	13000		12995	12990	12985
D17-011333	2017	OH	7	draft	5	11485	11480	11475	11470		11465	11460	11455
D17-015854	2017	MN	7	draft	3	12970	12975	--	--		12980	12985	12990
D17-015841	2017	OK	7	draft	5	15475	15470	15465	15460		15455	15450	15445
D17-024028	2017	MO	7	draft	4	15815	--	15820	15825		15830	15835	15840
D16-043487	2016	IA	7	draft	4	17575	--	17570	17565		21415	21420	21425
D16-040952	2016	KS	7	draft	5	11835	11830	11825	11820		11815	11810	11805
D17-024099	2017	IL	7	draft	4	11415	--	11420	11425		11430	11435	11440
D17-023076	2017	MI	7	draft	5	16070	16075	16080	16085		16090	16095	16100
D17-021385	2017	MN	7	draft	3	19245	--	19250	19255		--	19260	19265
D17-017398	2017	MN	7	draft	5	07830	07835	07840	07845		07850	07855	07860
D16-020409	2016	OH	7	draft	5	14860	14855	19435	19430		19425	19420	19415
D16-012499	2016	AR	7	draft	2	11030	--	--	--		11035	11040	11045
D16-029575	2016	IL	7	draft	4	10435	--	10430	10425		10420	10415	10410
D16-025573	2016	NE	7	draft	5	14140	14145	14150	14155		14160	14165	14170
D16-040083	2016	MO	7	draft	5	16795	16800	20035	20040		20045	20050	20055
D16-037224	2016	TN	7	draft	4	22045	22050	--	19560		19565	19570	19575
D17-007240	2017	IL	7	draft	4	13505	--	13510	13515		13520	13525	13530
D16-005794	2016	IL	7	draft	5	09760	09765	09770	09775		09780	09785	09790
D17-007784	2017	OK	7	draft	5	12410	12405	12400	12395		12390	12385	12380
D17-007548	2017	MN	7	draft	3	12920	--	--	12915		12910	12905	12900
D17-009543	2017	NE	7	draft	5	17070	17065	17060	17055		17050	17045	17050
D17-008867	2017	TN	7	draft	5	09620	09625	09630	09635		09640	09645	09650
D17-012749	2017	OH	7	draft	5	16565	16570	16575	16580		20665	20670	20675
D17-012710	2017	MN	7	draft	5	14125	14120	14115	14110		14105	14100	14095
D17-015467	2017	MI	7	draft	5	13325	13320	13315	13310		13305	13300	13295
D17-013380	2017	NE	7	draft	4	17520	17525	17530	--		20990	20985	20980
D16-051012	2016	MI	7	draft	5	13970	13965	13960	13955		13950	13945	13940
D16-050964	2016	MO	7	draft	5	12300	12305	12310	12315		12320	12325	12330
D16-009001	2016	KS	7	draft	5	09105	09100	09095	09090		09085	09080	09075
D16-006047	2016	OH	7	draft	5	11615	11610	11605	11600		11595	11590	11585
D16-010616	2016	IA	7	draft	5	07480	07475	07470	07465		07460	07455	07450
D16-009793	2016	SD	7	draft	5	06310	06315	06320	06325		06330	06335	06340
D17-003332	2017	NE	7	draft	5	08705	08700	08695	08690		08685	08680	08675
D16-051308	2016	IA	7	draft	4	11145	--	11140	11135		11130	11125	11120
D17-005181	2017	ND	7	draft	5	13185	13180	13175	13170		13165	13160	13155
D17-005027	2017	OK	7	draft	5	18070	18065	18060	18055		21670	21675	21680
D17-019755	2017	TX	7	draft	5	14800	14795	14790	14785		14780	14775	14770
D17-024432	2017	MN	7	draft	4	18425	18430	--	20900		20895	20890	20885
D17-016507	2017	NE	7	draft	5	16085	16090	19530	19535		19540	19545	19550
D17-019744	2017	TX	6	draft	3	10535	--	--	10540		10545	10550	10555
D17-014057	2017	IL	7	draft	4	12735	--	12740	17455		17460	17465	17470
D17-011508	2017	OK	7	draft	5	09440	09435	09430	09425		09420	09415	09410
D17-011401	2017	MN	6	draft	3	14360	--	--	14365		14370	14375	14380
D17-010455	2017	AR	7	draft	5	12160	12165	12170	12175		12180	12185	12190
D17-000449	2017	OK	7	draft	4	14650	14655	14660	--		14665	14670	14675
D16-052474	2017	IL	7	draft	4	12325	--	12330	12335		12340	12345	12350
D16-051599	2016	MI	7	draft	5	16015	16010	16005	16000		15995	15990	15985
D16-051194	2016	KS	7	draft	5	14480	14475	14470	14465		14460	14455	14450
D16-047428	2016	IA	6	closed	3	07700	--	--	07695		07690	07685	07680
D16-046248	2016	OH	7	draft	4	13980	--	13985	13990		13995	14000	14005
D16-045868	2016	IL	7	draft	4	11505	--	11500	11495		11490	11485	11480
D16-042970	2016	SD	7	draft	4	10205	--	10210	10215		10220	10225	10230
D16-030598	2016	KS	7	draft	5	07730	07735	07740	07745		07750	07755	07760
D16-029624	2016	IA	7	draft	5	12105	12100	12095	12090		12085	12080	12075
D16-049708	2016	ND	7	draft	5	08125	08120	08115	08110		08105	08100	08095
D16-028640	2016	MI	7	draft	5	04145	04140	04135	04130		04125	04120	04115
D16-026119	2016	KS	7	draft	5	22615	22620	16735	16730		16725	16720	16715
D16-050573	2016	IA	7	draft	5	16345	16340	16335	20305		20310	20315	20320
D16-048762	2016	IA	7	draft	5	12105	12100	12095	12090		12085	12080	12075
D16-048635	2016	IL	7	draft	5	13835	13840	13845	13850		13855	13860	13865
D16-038807	2016	WI	7	draft	5	11750	11745	11740	11735		11730	11725	11720
D16-037085	2016	IA	7	draft	5	13255	13260	13265	13270		13275	13280	13285
D17-018987	2017	AR	7	draft	5	16075	16080	16085	16090		19480	19485	19490
D17-020879	2017	CA	7	draft	5	12845	12840	17075	17080		17085	17090	17095
D16-043337	2016	MO	7	draft	5	08920	08925	08930	08935		08940	08945	08950
D17-003798	2017	AR	7	draft	5	11655	11650	11645	11640		11635	11630	11625
D16-049550	2016	OK	7	draft	4	15940	--	15935	15930		15925	15920	15915
D16-045206	2016	MN	7	draft	5	12795	12790	12785	12780		12775	12770	12765
D17-015166	2017	OK	7	draft	5	13140	13135	13130	13125		13120	13115	13110
D17-013935	2017	MN	7	draft	5	14320	14315	14310	14305		14300	14295	14290
D17-016909	2017	IA	7	draft	4	19550	--	19555	19560		21675	21670	21665
D17-002942	2017	IL	7	draft	5	21870	21865	21860	21855		21850	21845	21840
D17-000951	2017	OK	7	draft	5	22225	22230	22235	22240		22245	22250	22255
D17-000792	2017	MN	7	draft	4	21200	--	21195	21190		21185	21180	21175
D17-017458	2017	MI	7	draft	4	21455	--	21450	21145		21440	21435	21430
D16-039610	2016	TX	7	draft	5	22210	22215	22220	22225		22230	22235	22240
D16-039331	2016	IA	7	draft	4	23440	--	23445	23450		24240	24235	24230
D16-039234	2016	TX	6	draft	3	22125	--	--	22120		22115	22110	22105
D16-021953	2016	NC	7	draft	5	17365	17370	17375	17380		17385	17390	17395
D16-038173	2016	IL	7	draft	4	13335	--	13340	13345		13350	13355	13360
D16-008326	2016	MO	7	draft	5	09710	09715	09720	09725		09730	09735	09740
D16-015472	2016	SD	7	draft	4	16650	--	16655	16660		16665	16670	16675
D16-006557	2016	PA	7	draft	5	22615	22610	22605	22600		22595	22590	22585
D16-008838	2016	SD	7	draft	5	23190	23195	23200	23745		23740	23735	23730
D16-005641	2016	OH	6	draft	3	23710	--	--	23715		23720	23725	23730
D16-020973	2016	CO	7	draft	5	23295	23290	23870	23875		23880	23885	23890
D16-004964	2016	MI	7	draft	5	22965	22960	22955	22950		22945	22940	22935
D15-062629	2015	TX	7	draft	5	23525	23530	23535	23915		23910	23905	23900
D15-062628	2015	TX	7	draft	5	23165	23160	23740	23745		23750	23755	23760
D15-061719	2015	KS	7	draft	5	22520	22515	22510	22505		22500	22495	22490
D15-061722	2015	TX	7	draft	5	22185	22190	22195	22200		22205	22210	22215
D16-003824	2016	NE	7	draft	5	16335	16340	16345	16350		16355	16360	16365
D15-056335	2015	MN	7	draft	5	13725	13730	13735	13740		13745	13750	13755
D15-056069	2015	KS	7	draft	5	22000	21995	21990	21985		21980	21975	21970
D15-055809	2015	TX	7	draft	5	22340	22335	22330	22325		22320	22315	22310
D16-006878	2016	PA	7	draft	5	22495	22500	22505	22510		22515	22520	22525
D16-005974	2016	SD	7	draft	5	23480	23485	24290	24285		24280	24275	24270
D16-008172	2016	OH	7	draft	5	23360	23355	23350	23345		23340	23335	23330
D16-008137	2016	SD	7	draft	5	22875	22870	22865	22860		22855	22850	22845
D16-008125	2016	IN	7	draft	4	22765	--	22770	22775		22780	22785	22790
D16-006978	2016	SD	7	draft	5	22980	22975	22970	22965		22960	22955	22950
D16-006818	2016	MO	7	draft	5	22525	22520	22515	22510		22505	22500	22495
D16-019368	2016	MO	7	draft	5	23035	23040	23045	23050		23755	23750	23745
D16-021147	2016	IA	7	draft	4	18355	--	18350	18345		18340	18335	18330
D16-016991	2016	NE	7	draft	5	22660	22655	23515	23520		23525	23530	23535
D16-010374	2016	KS	7	draft	5	22960	22955	22950	22945		22940	22935	22930
D16-011513	2016	MO	7	draft	4	23335	--	23340	23345		23350	23355	23360
D16-014636	2016	NE	7	draft	4	23270	--	23275	23280		23975	23970	23965
D16-014064	2016	OH	7	draft	4	22050	--	22045	22040		22035	22030	22025
D16-20785	2016		7	draft	4	22125	--	22120	22115		22110	22105	22100

## Sheet: Sheet2
D16-020124		D16-020124		D16-030796
D16-023682		D16-023682		D16-048087
D16-024771		D16-024771		D17-001406
D16-033247		D16-033247		D17-015854
D16-041144		D16-041144		D17-021385
D17-008934		D17-008934		D17-007548
D17-024028		D17-024028		D17-019744
D16-043487		D16-043487		D17-011401
D17-024099		D17-024099		D16-047428
D16-029575		D16-029575		D16-039234
D16-037224		D16-037224		D16-005641
D17-007240		D17-007240
D17-013380		D17-013380
D16-051308		D16-051308
D17-024432		D17-024432
D17-014057		D17-014057
D17-000449		D17-000449
D16-052474		D16-052474
D16-046248		D16-046248
D16-045868		D16-045868
D16-042970		D16-042970
D16-049550		D16-049550
D17-016909		D17-016909
D17-000792		D17-000792
D17-017458		D17-017458
D16-039331		D16-039331
D16-038173		D16-038173
D16-015472		D16-015472
D16-008125		D16-008125
D16-021147		D16-021147
D16-011513		D16-011513
D16-014636		D16-014636
D16-014064		D16-014064
D16-20785		D16-20785
